# Supplementary material for: Mild hypothermia promotes neuronal differentiation of human neural stem cells via RBM3-SOX11 signaling pathway
Source: PubMed Central journal article supplement — iScience. 2024 Mar 6;27(4):109435. doi: 10.1016/j.isci.2024.109435 (PMC10960102; doi:10.1016/j.isci.2024.109435), 2024-03-06
Supplement: mmc1.pdf [file mmc1.pdf]

iScience, Volume 27

## **Supplemental information**

**Mild hypothermia promotes neuronal  
differentiation of human neural stem  
cells via RBM3-SOX11 signaling pathway**

**Yuxiao Ma, Zhenghui He, Jiangchang Wang, Ping Zheng, Zixuan Ma, Qian Liang, Qiao Zhang, Xiongfei Zhao, Jialin Huang, Weiji Weng, Jiyao Jiang, and Junfeng Feng**

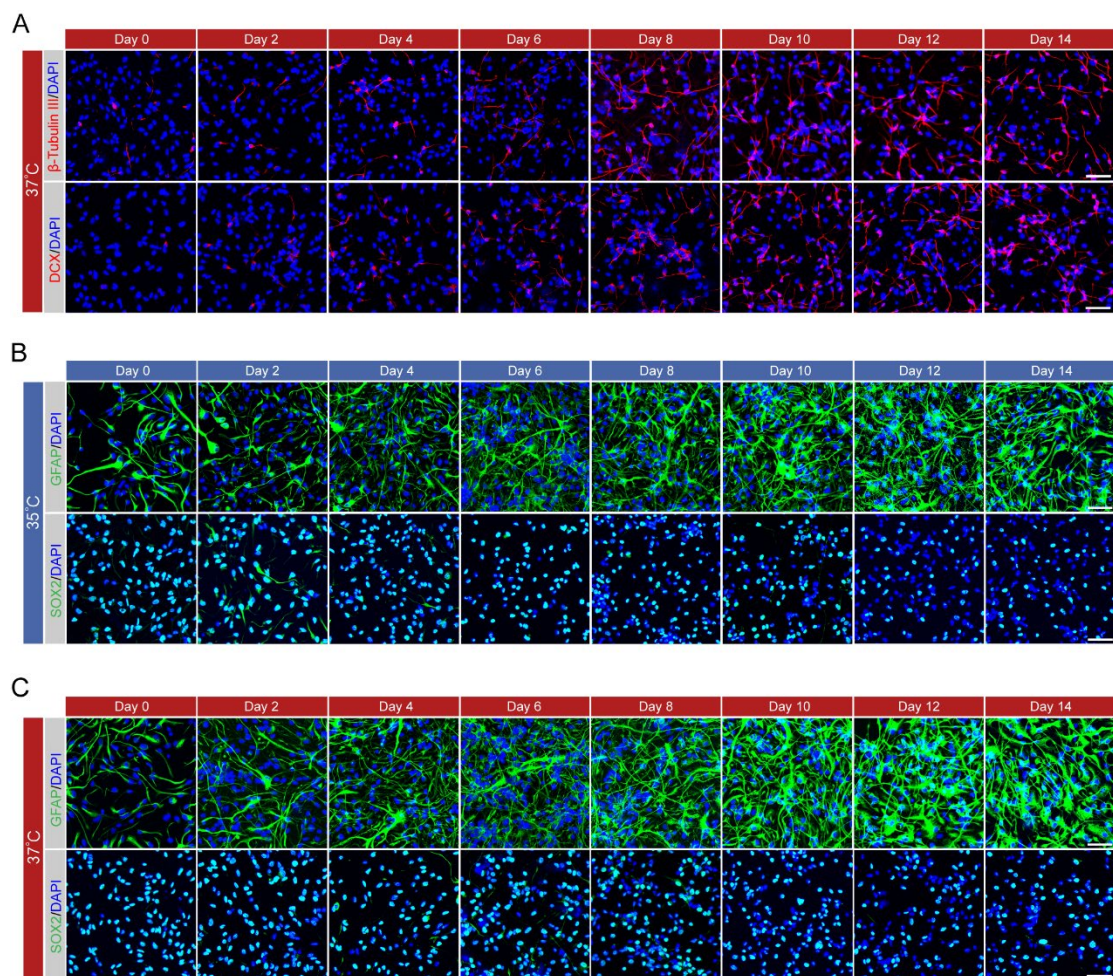

**Figure S1. The timeline of neuronal and glial differentiation of cultured hNSCs with 35°C- and 37°C-treatment, related to Figure 1.**

(A) Representative immunofluorescence images showing  $\beta$ -Tubulin III and DCX positive hNSCs from Day 0 to Day 14 every two days with 37°C-treatment. (B-C) Representative immunofluorescence images showing GFAP and SOX2 positive hNSCs from Day 0 to Day 14 every two days with 35°C- and 37°C-treatment. Scale bars represent 50  $\mu$ m in (A-C).

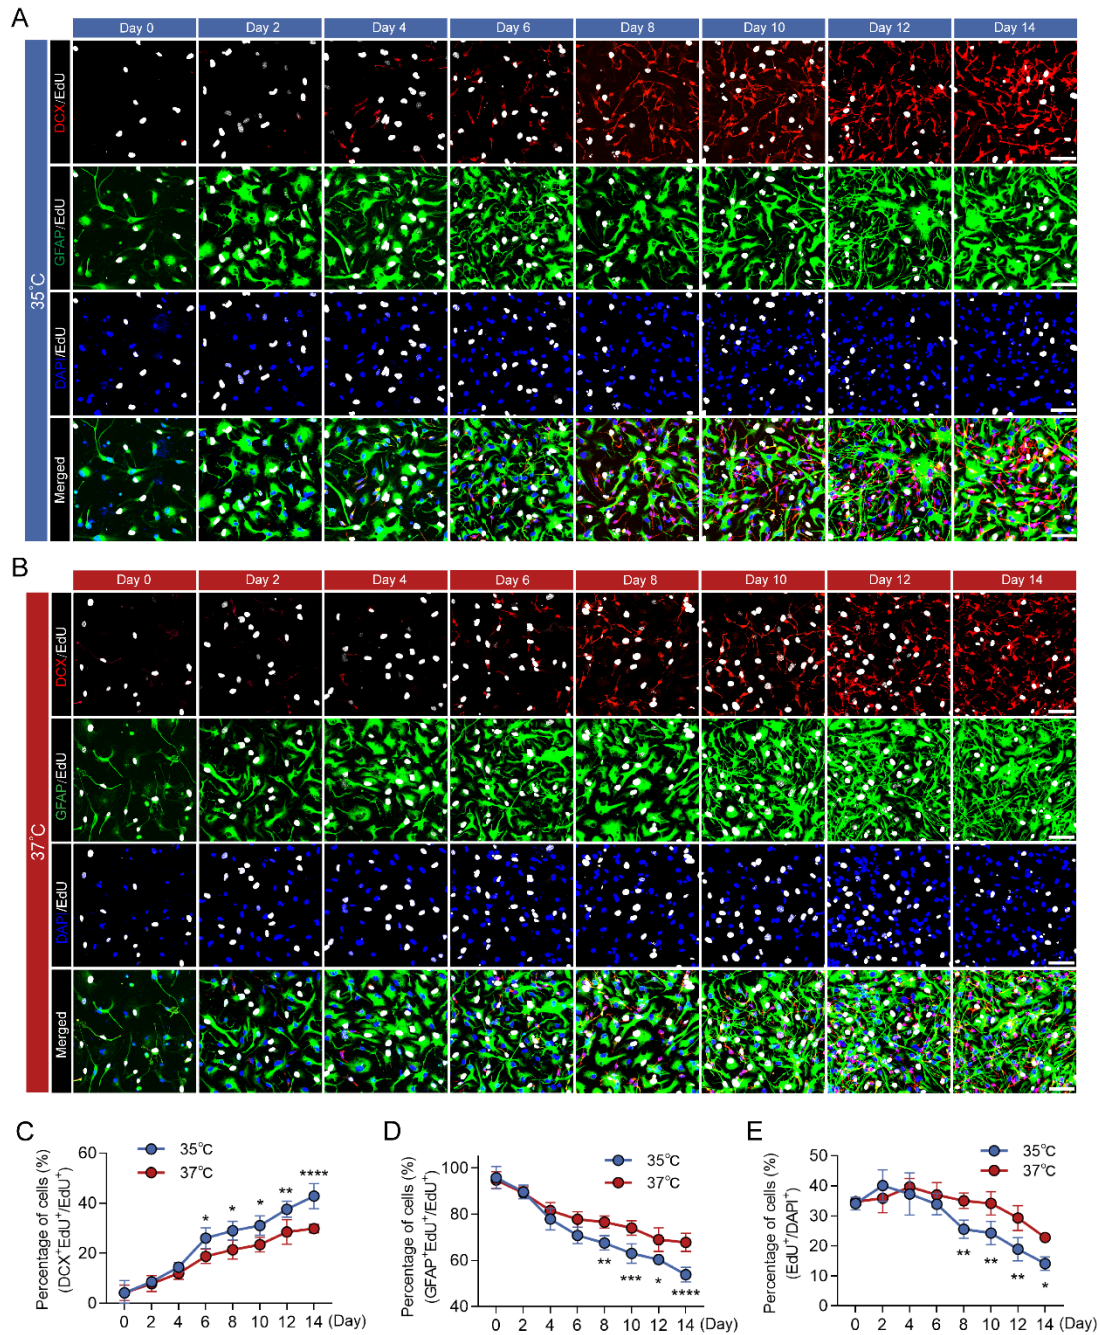

**Figure S2. Mild hypothermia of 35°C induced newborn neurons and repressed the proliferation of differentiated hNSCs, related to Figure 1.**

(A-B) Representative immunofluorescence images showing DCX, GFAP and EdU positive hNSCs from Day 0 to Day 14 every two days with 35°C- and 37°C-treatment. (C) The percentage of DCX and EdU positive cells to EdU positive cells in (A-B). (D) The percentage of GFAP and EdU positive cells to EdU positive cells in (A-B). (E) The percentage of EdU positive cells in (A-B). All data presented as mean  $\pm$  SD. Two-way

ANOVA tests were used in (C-E). \* $p < 0.05$ , \*\* $p < 0.01$ , \*\*\* $p < 0.001$ , \*\*\*\* $p < 0.0001$ .  
Scale bars represent 50 $\mu\text{m}$  in (A-B).

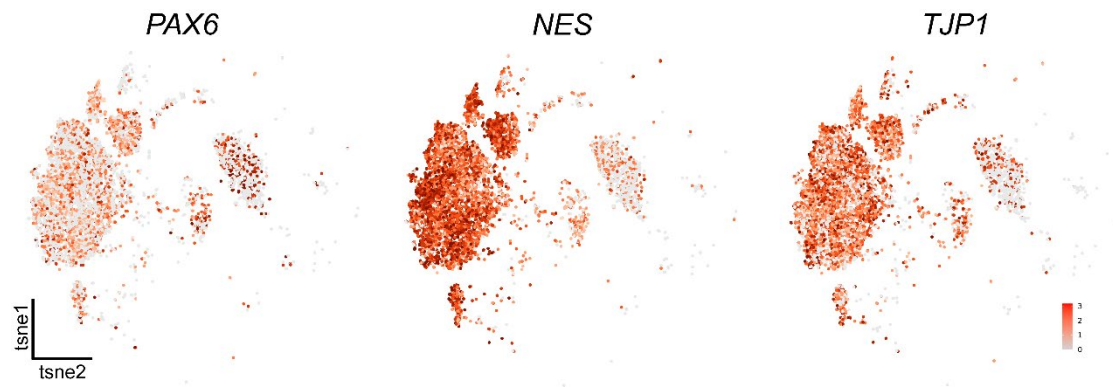

**Figure S3. Single-cell RNA sequencing results of hNSCs at Day 0, related to Figure 2.**

The tSNE plots of single-cell RNA sequencing showing the *PAX6*, *NES*, *TJP1* genes expression pattern.

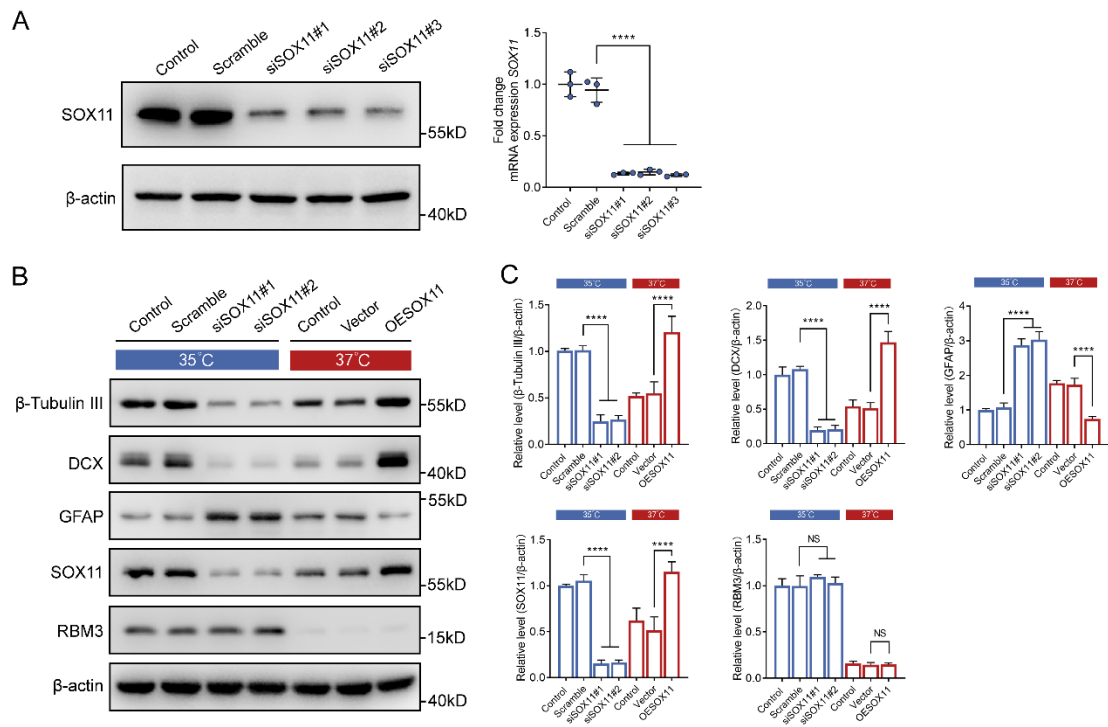

**Figure S4. SOX11 promoted neuronal differentiation of hNSCs, related to Figure 4.**

(A) Western blots and qRT-PCR analysis showing the protein and mRNA expressions of SOX11 after scramble or RBM3 siRNA transfection.  $\beta$ -actin was used as the loading control. (B) Western blots analysis showing  $\beta$ -Tubulin III, DCX, GFAP, SOX11 and RBM3 protein expression at Day 14. (left 4 lanes) hNSCs were transfected with scramble or RBM3 siRNA with 35°C-treatment. (right 3 lanes) hNSCs were transfected with vector or RBM3 by lentivirus with 37°C-treatment.  $\beta$ -actin was used as the loading control. (C) The quantification of Western blots of (B). Normalized  $\beta$ -Tubulin III, DCX, GFAP, SOX11 and RBM3 to corresponding loading control were summarized for three independent trials. All data presented as mean  $\pm$  SD. One-way ANOVA tests were used in (A) and (C). NS, not significant; \*\*\*\* $p < 0.0001$ .

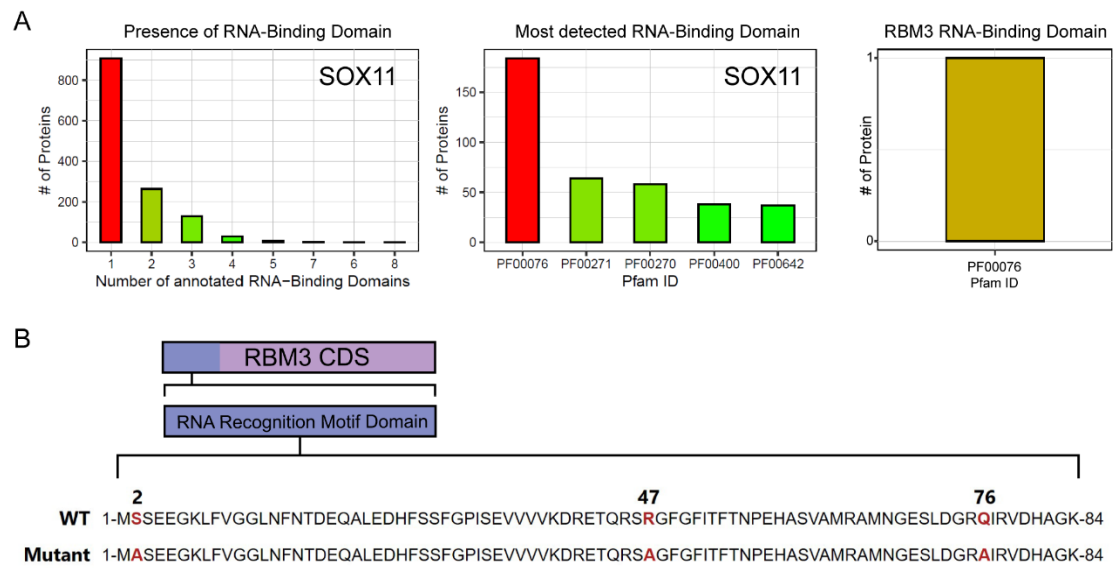

**Figure S5. RBM3 binds to mRNA through RNA recognition motif domain, related to Figure 5.**

(A) The predicted binding domain to SOX11 mRNA and of RBM3 by transcripts VS RNA-binding proteome analysis. (B) The amino acid sequence and mutation sites of RNA recognition motif domain of RBM3.

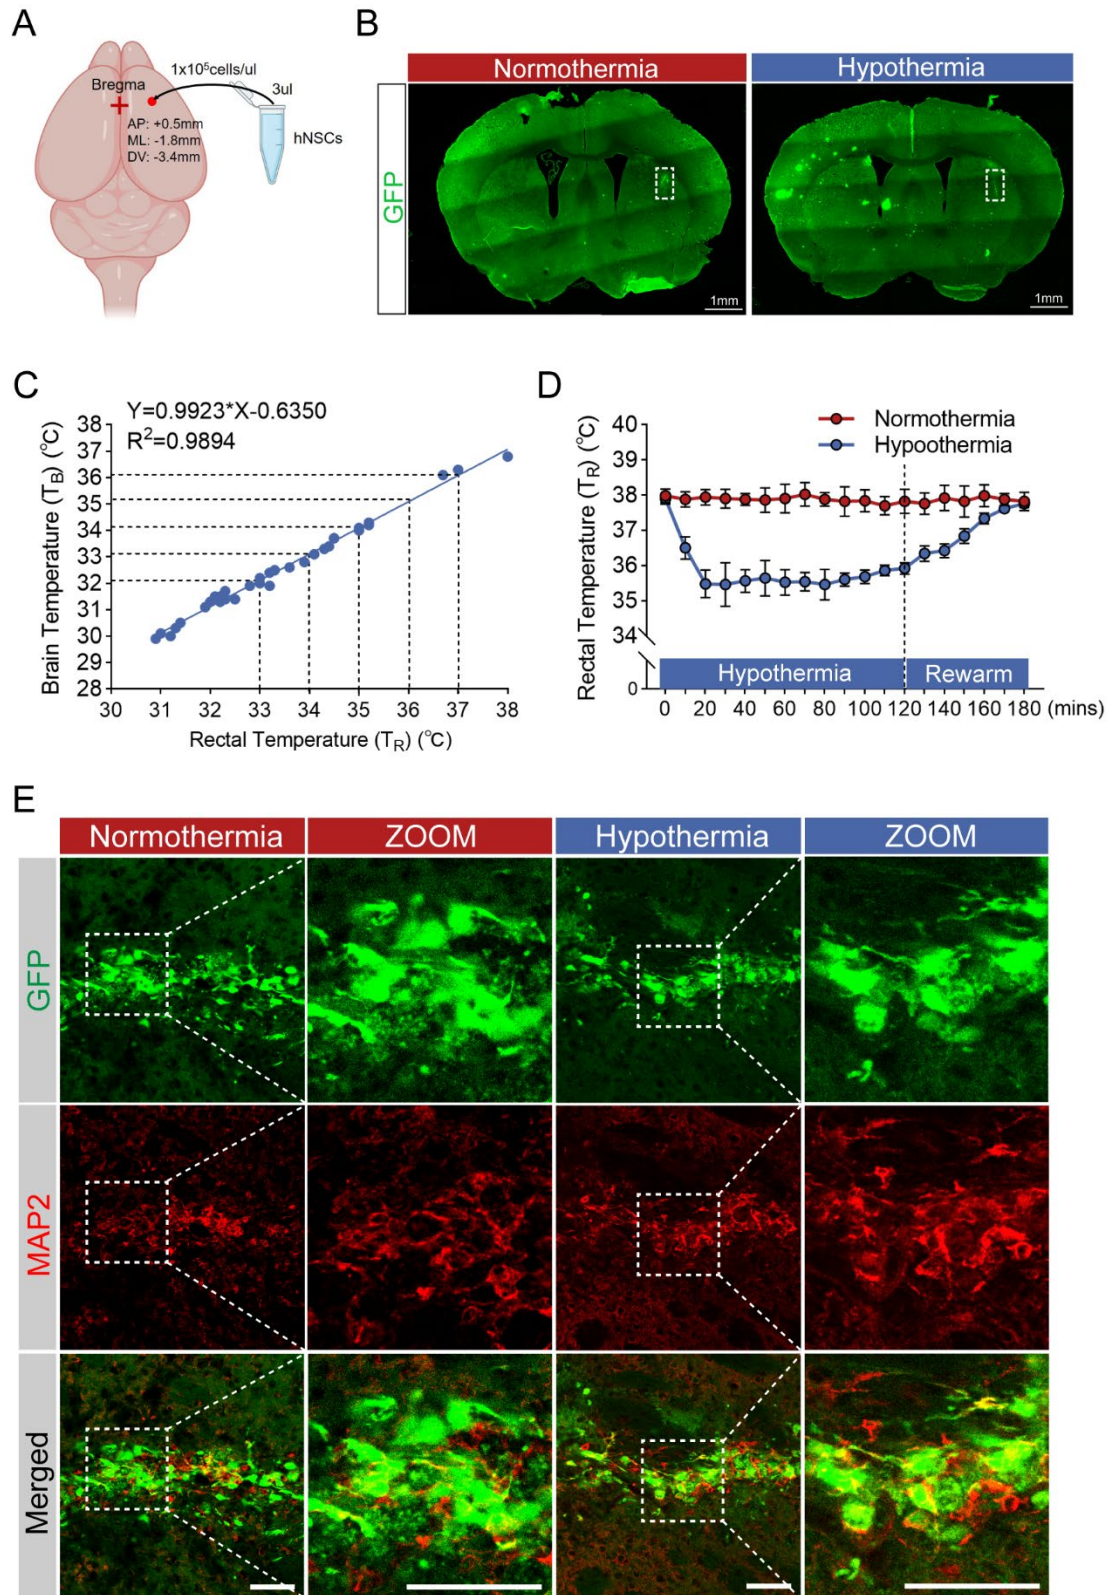

**Figure S6. Mild hypothermia of 35°C regulated transplanted hNSCs differentiation into neurons *in vivo*, related to Figure 6.**

**(A)** The transplantation schematic of hNSCs to the mouse brain. **(B)** The transplanted



region of GFP-labeled hNSCs. The GFP-labeled hNSCs that were transplanted are located in the rectangle region. **(C)** The relationship of mouse brain temperature and rectal temperature. **(D)** The rectal temperature during different period of normothermia and mild hypothermia. **(E)** Representative immunofluorescence images of MAP2 positive GFP-labeled cells at Day 14 with normothermia and mild hypothermia treatments. All data presented as mean  $\pm$  SD. Scale bars represent 1mm in **(B)** and 50 $\mu$ m in **(E)**.
